# Supplementary material for: Recurrent epimutations activate gene body promoters in primary glioblastoma
Source: HighWire-hosted journal article supplement (doi:10.1101/gr.164707.113), 2014-04-07
Supplement: Supplemental_Table_S2.xlsx [file Supplemental_Table_S2.xlsx]

## Sheet: Sheet1
RECURRING HYPOMETHYLATED DMRS (q < 1e-13)							RECURRING HYPERMETHYLATED DMRS (q < 1e-13)
Ontology	Term Name	Binom Rank	Binom FDR Q-Val	Hyper Rank	Hyper FDR Q-Val		Ontology	Term Name	Binom Rank	Binom FDR Q-Val	Hyper Rank	Hyper FDR Q-Val
GO Molecular Function	neurotransmitter:sodium symporter activity	9	2.95574e-06	2	0.00449206		GO Molecular Function	sequence-specific DNA binding transcription factor activity	1	1.05775e-120	3	6.26639e-40
	neurotransmitter transporter activity	12	8.52679e-06	3	0.0147335		GO Molecular Function	nucleic acid binding transcription factor activity	2	4.37725e-120	1	1.07589e-43
	regulation of gene expression by genetic imprinting	1	2.49247e-15	109	0.0477295		GO Molecular Function	sequence-specific DNA binding	3	1.02437e-104	4	6.42378e-24
	digestive system development	19	4.03342e-08	55	0.0036124		GO Molecular Function	DNA binding	4	2.93436e-100	6	1.33034e-15
	osteoblast differentiation	24	1.84623e-07	4	0.000257754		GO Molecular Function	transcription regulatory region DNA binding	6	8.47439e-39	7	1.30724e-15
	heart development	65	5.49673e-06	35	0.00148715		GO Molecular Function	regulatory region DNA binding	7	2.81364e-38	11	1.09128e-05
	cell differentiation in spinal cord	68	5.95234e-06	6	0.000247487		GO Molecular Function	transcription factor binding	11	6.25889e-24	8	1.09228e-10
	regulation of photoreceptor cell differentiation	70	6.13327e-06	90	0.0304267		GO Molecular Function	transcription regulatory region sequence-specific DNA binding	12	2.49603e-17	9	1.49689e-10
	digestive tract development	81	1.23154e-05	63	0.00637186		GO Molecular Function	sequence-specific DNA binding RNA polymerase II transcription factor activity	13	2.21901e-14	13	0.000286255
	negative regulation of muscle cell differentiation	104	5.17156e-05	99	0.0391589		GO Molecular Function	RNA polymerase II regulatory region sequence-specific DNA binding	18	1.2242e-08	14	0.000382854
	musculoskeletal movement	112	6.38187e-05	106	0.046091		GO Molecular Function	RNA polymerase II regulatory region DNA binding	19	1.60329e-08	18	0.00686747
	foregut morphogenesis	113	6.641e-05	86	0.0293873		GO Molecular Function	activating transcription factor binding	20	1.79268e-08	12	0.000246661
GO Cellular Component	extracellular matrix	7	5.80623e-06	4	0.0404233		GO Molecular Function	sequence-specific distal enhancer binding RNA polymerase II transcription factor activity	28	1.42304e-06	16	0.0042656
Mouse Phenotype	increased stomach mucosa thickness	1	1.29493e-10	30	0.0281858		GO Molecular Function	chromatin binding	31	5.05904e-06	15	0.00412132
	abnormal chief cell morphology	2	9.53913e-11	38	0.0361467		GO Molecular Function	Wnt-activated receptor activity	32	1.34715e-05	21	0.022208
	aerophagia	10	5.25448e-09	48	0.0474907		GO Molecular Function	RNA polymerase II core promoter proximal region sequence-specific DNA binding transcription factor activity	33	2.92955e-05	19	0.0151202
	abnormal stomach wall morphology	12	9.66657e-09	10	0.00950093		GO Molecular Function	adrenergic receptor activity	37	6.2634e-05	17	0.00454229
	abnormal stomach mucosa morphology	14	2.39687e-08	24	0.020005		GO Molecular Function	RNA polymerase II core promoter proximal region sequence-specific DNA binding transcription factor activity involved in positive regulation of transcription	38	7.43941e-05	20	0.0180641
	abnormal gastric gland morphology	18	1.12806e-07	34	0.0302366		GO Molecular Function	Wnt-protein binding	39	0.000334792	22	0.0285606
	abnormal intestine morphology	69	3.07468e-05	15	0.0165492		GO Molecular Function	epinephrine binding	52	0.00966908	3	1.4454e-27
	abnormal stomach morphology	70	3.40416e-05	23	0.0199113		GO Biological Process	pattern specification process	1	1.18959e-83	26	4.99331e-21
	small lung lobe	78	4.82756e-05	45	0.0467517		GO Biological Process	transcription, DNA-dependent	7	1.66335e-73	32	3.98682e-20
	abnormal ischium morphology	104	0.000152254	30	0.0281858		GO Biological Process	RNA biosynthetic process	8	2.07021e-73	6	2.30843e-27
Disease Ontology	substance dependence	6	9.01842e-07	5	0.0200218		GO Biological Process	embryo development	14	1.51886e-69	18	1.7273e-24
	substance-related disease	9	3.71329e-06	8	0.0386325		GO Biological Process	embryonic morphogenesis	15	2.40697e-68	15	3.3762e-25
Pathway Commons	Na+/Cl- dependent neurotransmitter transporters	3	1.78755e-06	1	0.0227312		GO Biological Process	regionalization	16	2.05482e-67	16	5.36407e-25
MSigDB Pathway	Genes involved in Na+/Cl- dependent neurotransmitter transporters	9	3.2629e-07	1	0.0124477		GO Biological Process	regulation of transcription from RNA polymerase II promoter	17	7.29916e-65	30	2.12136e-20
	Genes involved in GPCR ligand binding	13	1.23879e-05	2	0.0161531		GO Biological Process	positive regulation of transcription from RNA polymerase II promoter	19	2.72229e-62	20	2.04251e-23
MGI Expression: Detected	TS11_ectoplacental cone	1	1.47028e-14	301	0.0251677		GO Biological Process	organ morphogenesis	20	4.82199e-62	31	2.8907e-20
	TS23_heart	2	2.05876e-13	196	0.00867457		GO Biological Process	positive regulation of transcription, DNA-dependent	25	5.20777e-55	27	1.34296e-20
	TS11_trophectoderm	3	1.86707e-11	316	0.0267601		GO Biological Process	positive regulation of gene expression	27	1.41814e-54	33	6.51876e-20
	TS23_knee joint primordium	4	5.07149e-11	319	0.0268288		GO Biological Process	positive regulation of macromolecule biosynthetic process	28	1.65977e-54	36	1.49955e-19
	TS24_head mesenchyme	6	1.08215e-10	171	0.00624479		GO Biological Process	positive regulation of RNA metabolic process	29	1.82043e-53	24	2.02179e-21
	TS22_ventricle	7	1.94461e-10	193	0.00777416		GO Biological Process	skeletal system development	32	2.90069e-52	37	3.21659e-19
	TS22_ovary	8	2.98019e-10	74	0.0011315		GO Biological Process	positive regulation of nucleobase-containing compound metabolic process	34	5.72466e-51	41	4.68187e-18
	TS10_parietal endoderm	9	3.26737e-10	36	0.000242386		GO Biological Process	positive regulation of biosynthetic process	35	1.58102e-50	43	2.00446e-17
	TS22_reproductive system; female	10	3.39666e-10	90	0.00170523		GO Biological Process	positive regulation of cellular biosynthetic process	36	1.81315e-50	38	2.15698e-18
	TS17_alimentary system	12	4.33297e-10	5	1.07419e-06		GO Biological Process	positive regulation of nitrogen compound metabolic process	37	8.77558e-50	45	4.9166e-17
MSigDB Perturbation	Genes within amplicon 5p15 identified in a copy number alterations study of 191 breast tumor samples.	1	2.03216e-33	1	1.4203e-10		GO Biological Process	embryonic skeletal system development	38	3.79455e-48	51	8.29709e-16
	Genes within amplicon 12q24 identified in a copy number alterations study of 191 breast tumor samples.	6	5.57632e-09	9	0.00109223		GO Biological Process	embryo development ending in birth or egg hatching	39	4.6811e-48	2	9.97294e-07
	Genes within amplicon 21q22 identified in a copy alterations study of 191 breast tumor samples.	8	2.238e-08	8	0.000757782		GO Cellular Component	transcription factor complex	3	9.69506e-48	12	0.00658403
	Genes up-regulated in HMEC cells (primary mammary epithelium) upon expression of both of TP53 [Gene ID=7157] and the transcriptionally active isoform of TP63 [Gene ID=8626] off adenoviral vectors.	10	6.71164e-08	6	0.000765084		GO Cellular Component	nucleoplasm part	10	4.7401e-26	11	0.00404261
	Genes up-regulated in the HMEC cells (primary mammary epithelium) upon expression of the transcriptionally active isoform of TP63 [Gene ID=8626] off adenoviral vector.	14	1.31645e-05	7	0.000772391		GO Cellular Component	neurofilament	33	0.00127702	13	0.024184
	Marker genes up-regulated in the 'chromosome 7 polysomy' subclass of hepatocellular carcinoma (HCC); characterized by polysomy of chromosome 7 and by a lack of gains of chromosome 8q.	64	0.00197039	12	0.0261005		GO Cellular Component	neurofilament cytoskeleton	39	0.00845565	2	1.28347e-24
	Genes down-regulated in cancer endometrium samples compared to the normal endometrium.	68	0.00210735	10	0.0011188		Mouse Phenotype	abnormal axial skeleton morphology	1	1.14565e-49	4	9.27935e-23
	High-level amplifications detected in oral squamous cell carcinoma (OSCC) lines by array-CGH analysis.	86	0.00497057	11	0.0234136		Mouse Phenotype	abnormal skeleton morphology	2	2.61297e-44	5	1.5493e-22
InterPro	Sodium:neurotransmitter symporter	31	2.00816e-06	1	0.0210246		Mouse Phenotype	skeleton phenotype	3	3.28137e-44	167	7.78538e-06
							Mouse Phenotype	abnormal tongue muscle morphology	4	1.04975e-43	12	1.29428e-16
							Mouse Phenotype	abnormal palate morphology	5	9.46376e-39	55	1.23808e-10
							Mouse Phenotype	decreased tympanic ring size	6	3.3994e-37	162	6.56293e-06
							Mouse Phenotype	short mandible	7	4.80499e-36	6	1.05535e-19
							Mouse Phenotype	abnormal craniofacial bone morphology	8	7.1291e-36	27	4.52711e-14
							Mouse Phenotype	abnormal rib morphology	9	8.19987e-36	35	7.60597e-13
							Mouse Phenotype	abnormal neurocranium morphology	10	9.29385e-36	133	2.02942e-06
							Mouse Phenotype	sacral vertebral transformation	11	1.29194e-35	66	7.03668e-10
							Mouse Phenotype	abnormal mandible morphology	12	2.30758e-35	8	1.39357e-18
							Mouse Phenotype	abnormal cranium morphology	13	3.06034e-35	59	1.64776e-10
							Mouse Phenotype	abnormal tympanic ring morphology	14	4.38779e-35	177	1.62227e-05
							Mouse Phenotype	abnormal thyroid gland development	15	1.57287e-34	25	3.81848e-14
							Mouse Phenotype	cleft palate	16	1.45024e-33	348	0.00102976
							Mouse Phenotype	abnormal rib development	19	3.44588e-33	47	3.49272e-11
							Mouse Phenotype	abnormal secondary palate development	20	7.8405e-33	18	3.72091e-15
							Mouse Phenotype	abnormal thoracic cage morphology	21	8.11311e-33	43	7.30507e-12
							Mouse Phenotype	abnormal palate development	22	1.91379e-32	1	0.0121472
							Human Phenotype	Synostosis of joints	13	8.09659e-13	2	0.0370314
							Human Phenotype	Cleft lip/palate	36	8.50591e-09	1	5.59526e-05
							Disease Ontology	physical disorder	1	1.52789e-13	33	0.0125014
							Disease Ontology	ventricular septal defect	2	5.11739e-12	44	0.0345589
							Disease Ontology	heart septal defect	3	4.3515e-08	39	0.0318313
							Disease Ontology	congenital heart defect	5	6.49709e-07	3	0.0340527
							MSigDB Cancer Neighborhood	Neighborhood of LTK	5	6.30211e-12	1	0.00385445
							MSigDB Cancer Neighborhood	Neighborhood of ARL3	9	5.27058e-09	2	0.0415272
							MSigDB Cancer Neighborhood	Neighborhood of FLT1	13	2.25098e-08	1	0.000224997
							PANTHER Pathway	Wnt signaling pathway	3	5.45686e-12	2	0.00978976
							PANTHER Pathway	Cadherin signaling pathway	4	1.22033e-10	2	0.00146024
							MSigDB Pathway	Genes involved in Class B/2 (Secretin family receptors)	3	8.14191e-06	6	0.0278
							MSigDB Pathway	Genes involved in G-protein activation	10	0.00831847	4	0.00421269
							MSigDB Pathway	Basal cell carcinoma	13	0.0109788	13	8.95535e-31
							MGI Expression: Detected	TS21_embryo; head	1	3.80851e-69	1	3.98013e-34
							MGI Expression: Detected	TS17_nervous system	2	1.81192e-68	3	2.1632e-33
							MGI Expression: Detected	TS17_central nervous system	3	1.24373e-68	15	1.12122e-29
							MGI Expression: Detected	TS21_central nervous system	4	3.24829e-63	19	1.35136e-28
							MGI Expression: Detected	TS21_nervous system	5	8.88091e-62	44	6.89326e-21
							MGI Expression: Detected	TS18_organ system	6	2.82376e-55	27	5.31715e-26
							MGI Expression: Detected	TS15_future spinal cord	10	8.27497e-52	106	8.19997e-16
							MGI Expression: Detected	TS18_nervous system	12	1.10339e-51	54	4.76716e-19
							MGI Expression: Detected	TS21_spinal cord	17	7.61059e-51	33	4.44224e-24
							MGI Expression: Detected	TS28_head	19	4.68309e-50	12	5.17439e-31
							MGI Expression: Detected	TS15_organ system	20	1.3571e-49	118	3.17923e-15
							MGI Expression: Detected	TS18_central nervous system	22	3.63752e-49	198	5.69547e-12
							MGI Expression: Detected	TS17_limb; mesenchyme	23	3.73599e-48	20	4.97362e-28
							MGI Expression: Detected	TS17_brain	24	3.66705e-48	55	5.7484e-19
							MGI Expression: Detected	Theiler_stage_18	25	5.45651e-48	91	7.6561e-17
							MGI Expression: Detected	TS21_peripheral nervous system	26	1.09186e-47	59	1.86373e-18
							MGI Expression: Detected	TS18_embryo	27	1.60647e-47	21	1.8524e-27
							MGI Expression: Detected	TS15_nervous system	28	4.32835e-47	41	5.36538e-21
							MGI Expression: Detected	TS17_limb	29	4.21556e-47	37	2.02216e-22
							MGI Expression: Detected	TS19_limb	31	9.1353e-47	2	1.42572e-68
							MSigDB Perturbation	Set 'H3K27 bound': genes posessing the trimethylated H3K27 (H3K27me3) mark in their promoters in human embryonic stem cells, as identified by ChIP on chip.	1	2.63308e-116	1	1.94391e-74
							MSigDB Perturbation	Set 'Eed targets': genes identified by ChIP on chip as targets of the Polycomb protein EED [Gene ID=8726] in human embryonic stem cells.	2	1.91716e-104	3	1.55496e-57
							MSigDB Perturbation	Set 'PRC2 targets': Polycomb Repression Complex 2 (PRC) targets; identified by ChIP on chip on human embryonic stem cells as genes that: posess the trimethylated H3K27 mark in their promoters and are bound by SUZ12 [Gene ID=23512] and EED [Gene ID=8726] Polycomb proteins.	3	3.15892e-82	5	1.90247e-11
							MSigDB Perturbation	Genes within amplicon 7p15 identified in a copy number alterations study of 191 breast tumor samples.	4	3.28231e-72	4	3.73984e-55
							MSigDB Perturbation	Set 'Suz12 targets': genes identified by ChIP on chip as targets of the Polycomb protein SUZ12 [Gene ID=23512] in human embryonic stem cells.	5	8.18022e-67	14	0.0032211
							MSigDB Perturbation	Genes bearing the H3K27me3 mark in normal cells; their DNA is methylated in cancer cells.	7	1.24463e-43	12	0.00125649
							MSigDB Perturbation	Selected genes down-regulated in the TLX1 [Gene ID=3195] Tet On iEBHX15-4 cells (pro-erythroblasts) at 6 h time point.	18	1.07208e-21	6	1.72796e-05
							MSigDB Perturbation	Genes with hypermethylated DNA in lung cancer samples.	21	2.57609e-18	18	0.00853505
							MSigDB Perturbation	Genes up-regulated in hES cells (human embryonic stem cells) after treatment with the ALK [Gene ID=238] inhibitor SB-431542 [PubChem=4521392].	31	1.83845e-14	18	0.00853505
							MSigDB Perturbation	Genes for which mutations result in atrial septation defects, a major class of congenital heart disease.	37	1.84869e-12	22	0.0173159
							MSigDB Perturbation	Genes for which mutations result in developmental defects in ventricular septation and atrioventricular cushion formation, a major class of congenital heart disease.	40	2.11389e-11	10	0.000107141
							MSigDB Perturbation	Genes up-regulated in the neural crest stem cells (NCS), defined as p75+/HNK1+ [Gene ID=4804, 27087].	43	3.58484e-11	8	9.64119e-05
							MSigDB Perturbation	Genes whose CpG islands became hypermethylated in breast progenitor cells pre-exposed to estradiol [PubChem=5757].	45	4.73769e-11	17	0.00686182
							MSigDB Perturbation	Selected gradually up-regulated genes whose expression profile follows that of HEMGN [Gene ID=55363] in the TLX1 [Gene ID=3195] Tet On iEBHX15-4 cells (pro-erythroblasts).	57	4.12928e-08	21	0.0126928
							MSigDB Perturbation	Genes up-regulated in SaOS-2 cells (osteosarcoma) upon knockdown of YY1 [Gene ID=7528] by RNAi.	77	3.16373e-05	28	0.0466197
							MSigDB Perturbation	ES/PNET (Ewing sarcoma; primitive neuroectodermal tumors) markers up-regulated in neuroblastoma cell lines expressing ESWR1-FLI1 [Gene ID=2130, 2313] fusion protein.	94	0.000295706	15	0.00368288
							MSigDB Perturbation	Genes silenced in HCT116 cells (colon cancer) by methylation of CpG islands in their promoters.	98	0.000442518	9	8.77787e-05
							MSigDB Perturbation	50 most interesting genes up-regulated in the pancreatic cancer cell lines (AsPC1, Hs766T, MiaPaCa2, Panc1) but not in the non-neoplastic cells (HPDE) by decitabine (5-aza-2'-deoxycytidine) [PubChem=451668].	105	0.00103776	16	0.00446088
							MSigDB Perturbation	Genes within amplicon 7p22 identified in a copy number alterations study of 191 breast tumor samples.	111	0.00240346	26	0.026543
							MSigDB Perturbation	Genes up-regulated in HUVEC cells (primary endothelium) after stimulation with leukotriene LTD4 [PubChem=3908] or thrombin (F2) [Gene ID=2147] for 1 h.	156	0.0392921
